# Supplementary material for: Organic co-solvents in aqueous DNA-based asymmetric catalysis
Source: Royal Society of Chemistry journal article supplement (doi:10.1039/b921385f), 2010-01-01
Supplement: b921385f.pdf [file b921385f.pdf]

**Electronic Supplementary Information**  
**for**  
**Organic Co-Solvents in aqueous DNA-Based Catalysis**

Rik P. Megens, Gerard Roelfes

*Stratingh Institute for Chemistry*  
*University of Groningen*  
*Nijenborgh 4, 9747 AG Groningen*  
*Email: J.G.Roelfes@rug.nl*

### dimethyl 2-(4-methyl-1-(1-methyl-1H-imidazol-2-yl)-1-oxopentan-3-yl)malonate (7b)

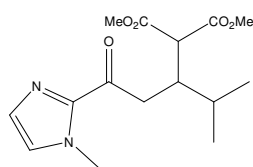

A colorless oil was obtained after column chromatography (SiO<sub>2</sub>, EtOAc/Heptane 4:6). <sup>1</sup>H NMR (400 MHz, CDCl<sub>3</sub>) δ 7.16 (d, *J* = 5.0, 1H), 7.02 (d, *J* = 14.5, 1H), 3.75 (s, 3H), 3.74 (s, 3H), 3.73 (s, 3H), 3.65 (d, *J* = 42.2, 1H), 3.40 (dd, *J* = 10.2, 1.7, 2H), 3.24 – 3.14 (m, 1H), 0.90 (m, 6H). δ <sup>13</sup>C (101 MHz, CDCl<sub>3</sub>) 192.6, 168.7, 168.0, 143.3, 129.2, 128.7, 54.5, 53.8, 44.6, 37.9, 36.1, 33.9, 30.3, 21.0, 18.6. HRMS: *m/z*: 310.1525 (Calcd. 310.1529)

Ee's were determined by HPLC analysis (Chiralcel-AD, heptane/iPrOH 98:2, 0.5 mL/min). Retention times: 44.9 and 55.0 mins

### dimethyl 2-(1-(1-methyl-1H-imidazol-2-yl)-1-oxooctan-3-yl)malonate (7c)

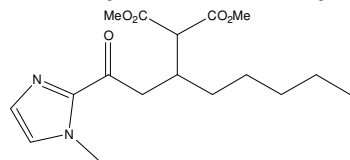

A slightly yellow oil was obtained after column chromatography (SiO<sub>2</sub>, EtOAc/Heptane 4:6). <sup>1</sup>H NMR (300 MHz, CDCl<sub>3</sub>) δ 7.12 (m, 1H), 7.02 (m, 1H), 4.13 – 3.88 (m, 6H), 3.88 – 3.54 (m, 5H), 3.40 – 3.01 (m, 4H), 1.90 – 1.01 (m, 6H), 1.01 – 0.52 (m, 3H). δ <sup>13</sup>C (101 MHz, CDCl<sub>3</sub>) 192.7, 167.1, 167.0, 129.2, 127.4, 60.5, 52.7, 52.6, 47.3, 41.3, 40.7, 37.3, 32.0, 25.4, 22.8, 14.2. HRMS: *m/z*: 338.1835 (Calcd. 338.1842)

Ee's were determined by HPLC analysis (Chiralcel-ODH, heptane/iPrOH 90:10, 0.5 mL/min). Retention times: 23.9 and 26.0 mins

### 3-(5-methoxy-1H-indol-3-yl)-4-methyl-1-(1-methyl-1H-imidazol-2-yl)pentan-1-one (9b)

A yellow oil was obtained after column chromatography (SiO<sub>2</sub>, EtOAc/Heptane 1:1). <sup>1</sup>H NMR (400 MHz, CDCl<sub>3</sub>) δ 8.02 (s, 1H), 7.16 (d, *J* = 8.7, 1H), 7.13 (s, 1H), 7.02 (d, *J* = 13.3, 2H), 6.93 (s, 1H), 6.79 (d, *J* = 8.8, 1H), 3.84 (s, 3H), 3.76 (s, 3H), 3.63 (dd, *J* = 25.2, 11.2, 2H), 3.44 (dd, *J* = 14.4, 3.8, 1H), 2.09 (dt, *J* = 12.8, 6.3, 1H), 1.74 (s, 1H), 0.94 (t, *J* = 7.4, 6H). δ <sup>13</sup>C (101 MHz, CDCl<sub>3</sub>) δ 192.8, 153.9, 131.4, 129.0, 128.9, 126.9, 122.8, 118.1, 112.0, 111.7, 101.6, 56.2, 56.1, 42.1, 38.6, 33.1, 20.7, 20.5. HRMS: *m/z*: 325.1782 (Calcd. 325.1790)

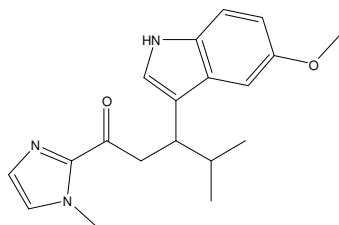

Ee's were determined by HPLC analysis (Chiralcel-AD, heptane/iPrOH 98:2, 0.5 mL/min). Retention times: 26.6 and 34.0 mins

### 3-(5-methoxy-1H-indol-3-yl)-1-(1-methyl-1H-imidazol-2-yl)octan-1-one (9c)

A colorless oil was obtained after column chromatography (SiO<sub>2</sub>, EtOAc/Heptane 1:1). <sup>1</sup>H NMR (400 MHz, CDCl<sub>3</sub>) δ 7.88 (br, 1H), 7.20 (d, *J* = 7.7, 1H), 7.12 (s, 1H), 7.05 (d, *J* = 18.9, 2H), 6.96 (s, 1H), 6.81 (d, *J* = 8.7, 1H), 3.86 (s, 3H), 3.85 (s, 3H), 3.72 – 3.61 (m, 2H), 3.57 – 3.44 (m, 1H), 1.86 – 1.68 (m, 2H), 1.45 – 1.06 (m, 6H), 1.04 – 0.65 (m, 3H). δ <sup>13</sup>C (50 MHz, CDCl<sub>3</sub>) 192.4, 153.7, 131.3, 128.8, 127.4, 126.7, 121.8, 111.9, 111.6, 105.0, 101.2, 55.9, 45.5, 36.1, 36.0, 32.4, 31.9, 27.2, 22.6, 14.1. HRMS: *m/z*: 353.4983 (Calcd. 353.4580)

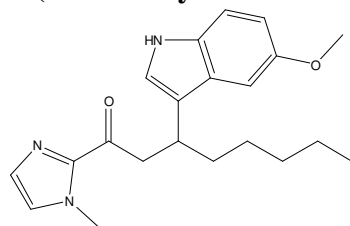

Ee's were determined by HPLC analysis (Chiralcel-ODH, heptane/iPrOH 90:10, 0.5 mL/min). Retention times: 26.6 and 34.5 mins

### 3-(5-methoxy-1H-indol-3-yl)-1-(1-methyl-1H-imidazol-2-yl)-3-phenylpropan-1-one (9e)

A brownish oil was obtained after column chromatography (SiO<sub>2</sub>, EtOAc/Heptane 1:1). <sup>1</sup>H NMR (400 MHz, CDCl<sub>3</sub>) δ 8.09 (s, 1H), 7.83 (d, *J* = 16.2, 1H), 7.70 (s, 2H), 7.40 – 7.01 (m, 5H), 6.87 (d, *J* = 8.5, 1H), 6.49 (s, 1H), 4.11 (s, 3H), 3.92-3.85 (m, 2H), 3.86 (s, 3H), 3.76 (m, 1H). δ <sup>13</sup>C (50 MHz, cdcl<sub>3</sub>) 192.6, 142.5, 129.2, 128.2, 127.8, 127.7, 127.1, 126.2, 123.8, 121.5, 111.3, 110.6, 103.6, 101.3, 59.5, 54.8, 37.9, 28.6. HRMS: *m/z*: 359.1639 (Calcd. 359.1634)

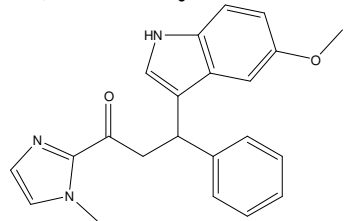

Ee's were determined by HPLC analysis (Chiralcel-AD, heptane/iPrOH 80:20, 0.5 mL/min). Retention times: 19.0 and 26.8 mins.

**Table S1.** Full investigation of solvent scope of the Diels-Alder reaction of azachalcone (**1**) with cyclopentadiene (**2**)

| Solvent | MeCN       | MeOH       | EtOH       | iPA        | DMF        | DMSO       | 1,4-Dioxane | DCM            | THF                    |
|---------|------------|------------|------------|------------|------------|------------|-------------|----------------|------------------------|
| Content | Conv (ee)   | Conv (ee)      | Conv (ee)              |
| 30%     | Full (99%)  | - <sup>a</sup> | 50% (99%) <sup>a</sup> |
| 33%     | Full (99%)  | - <sup>a</sup> | 34% (99%) <sup>a</sup> |
| 35%     | Full (98%) | Full (98%) | Full (98%) | Full (97%) | Full (98%) | Full (97%) | Full (93%)  | - <sup>a</sup> | - <sup>a</sup>         |
| 40%     | 60% (80%)  | 49% (81%)  | 43% (79%)  | 40% (75%)  | 52% (80%)  | 39% (74%)  | Full (82%)  | - <sup>a</sup> | - <sup>a</sup>         |

General conditions: 0.15 mM Cu(dmbipy), 0.67 mg/ml st-DNA, 1 mM azachalcone, 3d, 15 mM cyclopentadiene. <sup>a</sup> DNA precipitation observed

**Table S2.** Full investigation of solvent scope of the Michael Addition of azachalcone (**1**) with dimethyl malonate (**4**)

| Solvent | MeCN       | MeOH       | EtOH       | iPA        | DMF        | DMSO       | 1,4-Dioxane | DCM                    | THF                     |
|---------|------------|------------|------------|------------|------------|------------|-------------|------------------------|-------------------------|
| Content | Conv (ee)   | Conv (ee)              | Conv (ee)               |
| 5%      | Full (96%) | Full (96%) | Full (96%) | Full (96%) | Full (95%) | Full (96%) | Full (94%)  | 15% (96%) <sup>a</sup> | Full (92%)              |
| 10%     | Full (96%) | Full (96%) | Full (96%) | Full (96%) | Full (95%) | Full (95%) | Full (93%)  | 8% (94%) <sup>a</sup>  | Full (90%) <sup>a</sup> |
| 15%     | Full (95%) | Full (95%) | Full (96%) | Full (96%) | Full (94%) | Full (93%) | Full (92%)  | 5% (86%) <sup>a</sup>  | 90% (87%) <sup>a</sup>  |
| 20%     | Full (94%) | Full (95%) | Full (95%) | Full (95%) | Full (92%) | Full (93%) | Full (90%)  | 4% (61%) <sup>a</sup>  | 60% (81%) <sup>a</sup>  |

General conditions: 0.15 mM Cu(dmbipy), 0.67 mg/ml st-DNA, 1 mM azachalcone, 100 mM dimethyl malonate, 1d. <sup>a</sup> DNA precipitation observed

**Table S3.** Full investigation of solvent scope of the Friedel-Crafts alkylation of  $\alpha,\beta$ -unsaturated 2-acylimidazole (**6**) with 5-methoxyindole (**7**)

| Solvent | MeCN       | MeOH       | EtOH       | iPA        | DMF        | DMSO       | 1,4-Dioxane | DCM                     | THF                     |
|---------|------------|------------|------------|------------|------------|------------|-------------|-------------------------|-------------------------|
| Content | Conv (ee)   | Conv (ee)               | Conv (ee)               |
| 5%      | Full (83%) | Full (82%) | Full (83%)  | full (81%) <sup>a</sup> | Full (81%)              |
| 10%     | Full (83%) | Full (83%) | Full (82%) | Full (83%) | Full (82%) | Full (83%) | Full (83%)  | 78% (75%) <sup>a</sup>  | Full (81%)              |
| 15%     | Full (81%) | Full (83%) | Full (82%) | Full (82%) | Full (83%) | Full (82%) | Full (83%)  | 55% (64%) <sup>a</sup>  | Full (71%) <sup>a</sup> |
| 20%     | Full (81%) | Full (82%) | Full (82%) | Full (81%) | Full (82%) | Full (82%) | Full (82%)  | 23% (60%) <sup>a</sup>  | Full (61%) <sup>a</sup> |

General conditions: 0.15 mM Cu(dmbipy), 0.67 mg/ml st-DNA, 1 mM 2-acyl imidazole **6**, 5 mM 5-methoxyindole, 1d. <sup>a</sup> DNA precipitation observed

**Figure S4.** CD-spectra of st- DNA in the presence of organic solvents

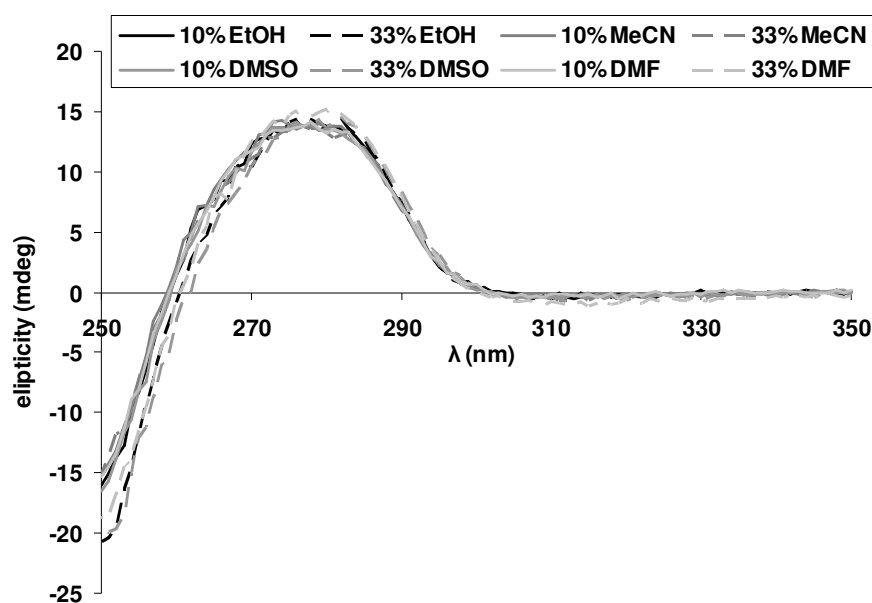

**Scheme S5.** Proposed catalytic cycle of the  $\text{Cu}^{2+}$  catalyzed Diels-Alder reaction of Azachalcone (**1**) with cyclopentadiene (**2**)<sup>1</sup>

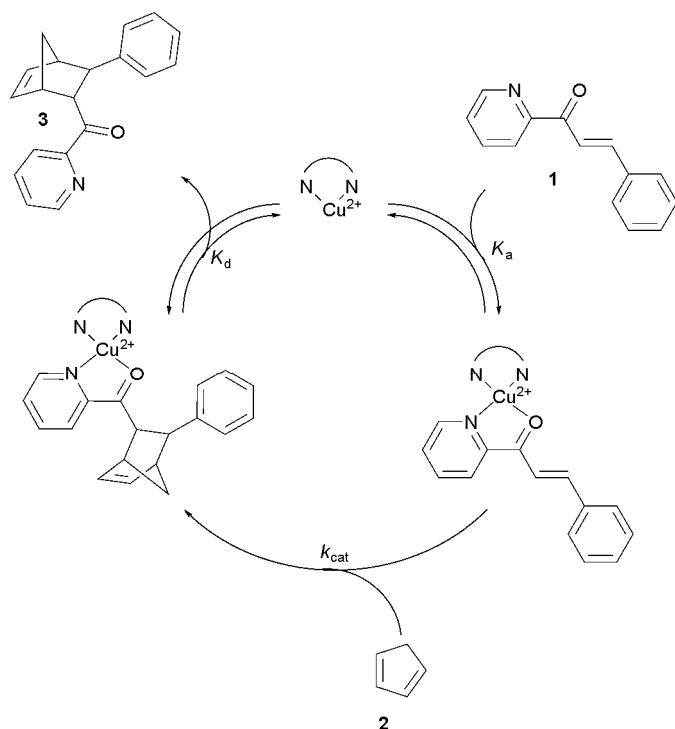

**Scheme S6.** Proposed catalytic cycle of the  $\text{Cu}^{2+}$  catalyzed Friedel-Crafts alkylation reaction of  $\alpha,\beta$ -unsaturated 2-acylimidazole (**6**) with 5-methoxyindole (**7**)

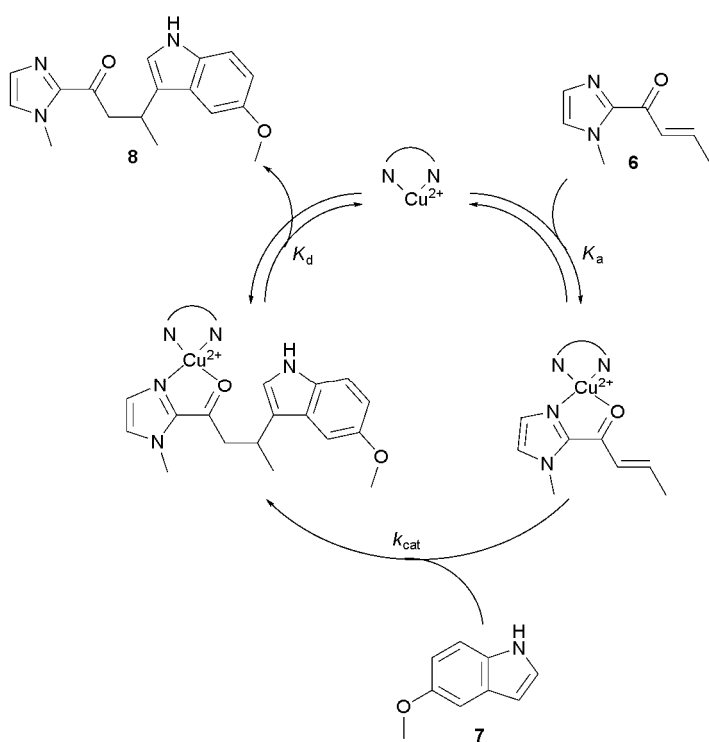

**Figure S7.** Temporal UV measurement of the Michael reaction of azachalcone (**1**) with dimethyl malonate (**4**). The decrease of azachalcone is followed in time at 326nm

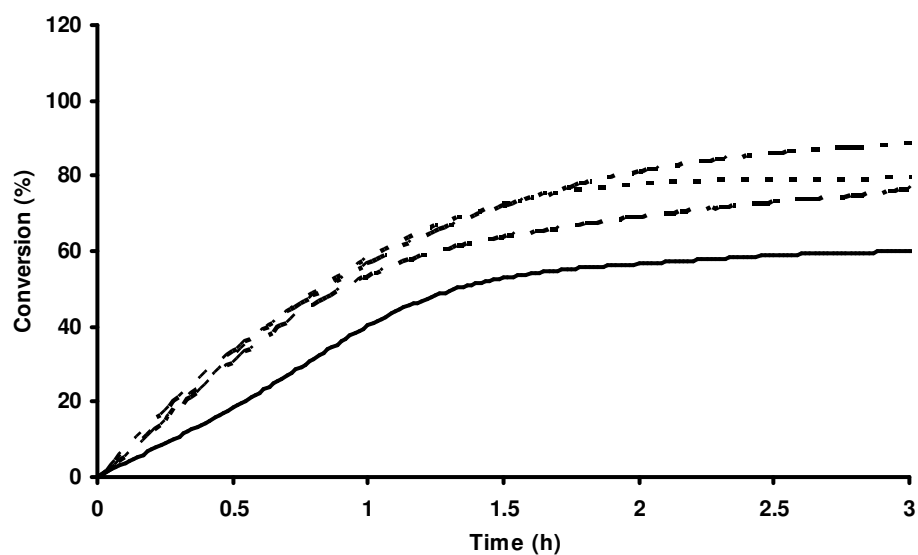

Temporal UV measurement of the Michael reaction, 0.15 mM Cu(dmbipy), 0.67 mg/ml st-DNA, 1 mM azachalcone, 100 eq. dimethyl malonate, 20 mM MOPS pH 6.5, 5°C at 326 nm — 0%, - - 5% MeCN, ..... 10% MeCN, - · - 15% MeCN

**Figure S8.** Temporal conversion of the Michael addition of azachalcone(**1**) and dimethyl malonate(**4**).

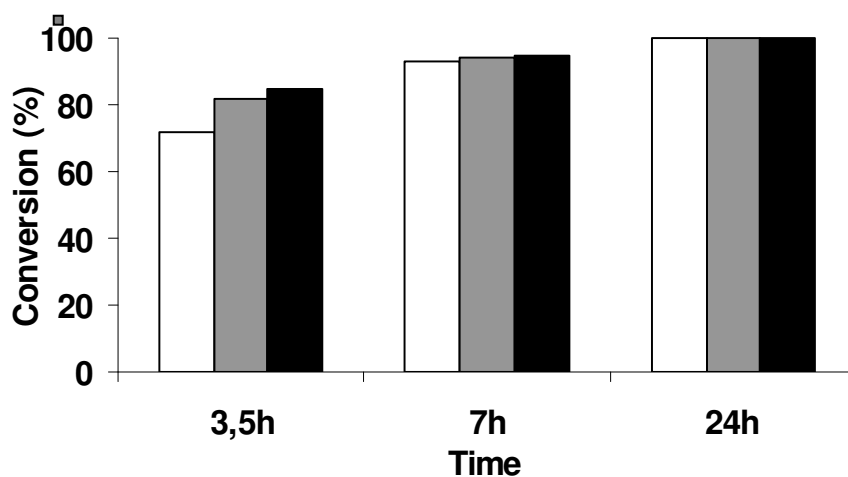

Conditions; 0.15 mM Cu(dmbipy), 0.67 mg/ml st-DNA, 1 mM azachalcone, 100 eq. dimethyl malonate, 20 mM MOPS pH 6.5, 5°C, analyzed with NMR and HPLC. □ = Water ■ = 5% MeCN ■ = 10% MeCN

**Figure S9.** Temporal conversion of the Friedel-Crafts alkylation reaction of 5-methoxyindole (7) with  $\alpha,\beta$ -unsaturated 2-acylimidazole (6).

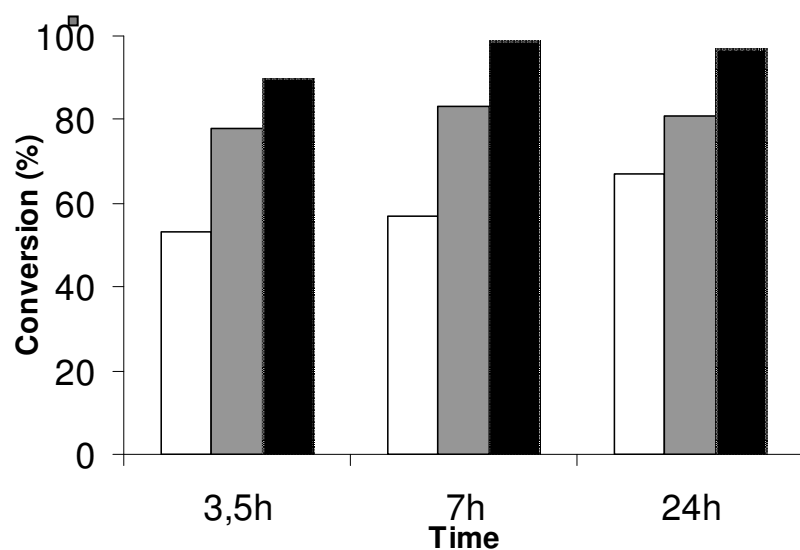

Conditions: 0.15 mM Cu(dmbipy), 0.67 mg/ml st-DNA, 1 mM  $\alpha,\beta$ -unsaturated 2-acylimidazole (4), 5 eq. 5-methoxyindole, 20 mM MOPS pH 6.5, 5°C, analyzed with NMR and HPLC. □ = Water ■ = 5% MeCN ■ = 10% MeCN

**Figure S10.** Temporal conversion of the Diels-Alder reaction of azachalcones (1b-d) with cyclopentadiene (2)

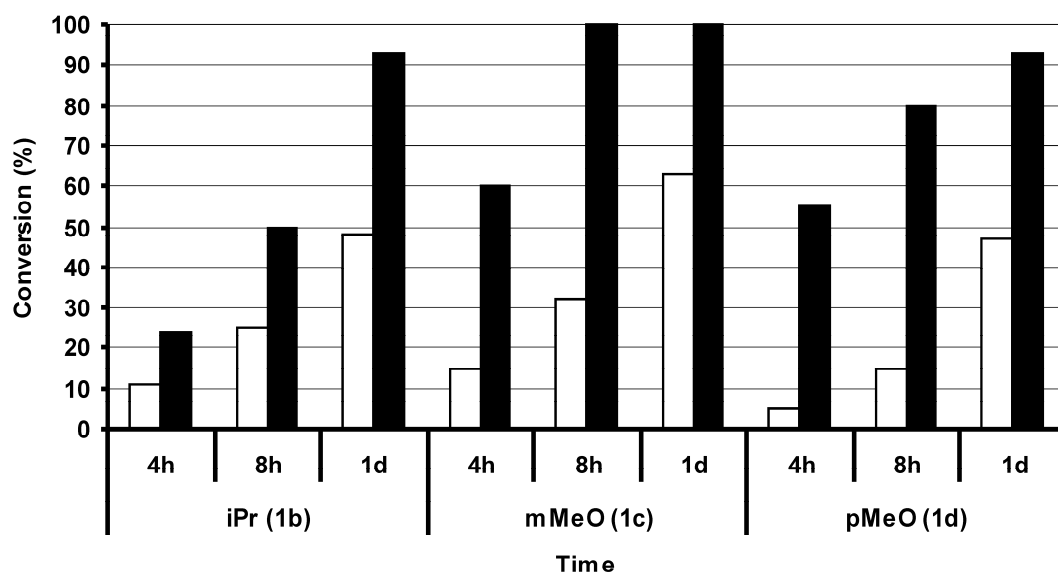

Figure S10: Temporal conversion of the Diels-Alder reaction. 0.15 mM Cu-dmbipy, 1 mM st-DNA in basepairs, 1mM enone substrate, 20 mM MOPS, pH 6.5. □ = Water ■ = 10% MeCN

**Table S11.** Substrate scope of DNA-Based catalytic Diels-Alder reactions with and without organic co-solvent

| Enone     | Nucleophile | ee (H <sub>2</sub> O) | ee (10% v/v MeCN) |
|-----------|-------------|-----------------------|-------------------|
| <b>1b</b> | <b>2</b>    | 96                    | 94                |
| <b>1c</b> | <b>2</b>    | 99                    | 99                |
| <b>1d</b> | <b>2</b>    | 99                    | 93                |

General condition; 0.15 mM Cu(dmbipy), 1 mM st-DNA in basepairs, 1 mM enone, 20 mM MOPS pH 6.5

**Table S12.** Increasing substrate concentration in the Diels-Alder reaction

| Substrate conc. | Water      | 33% MeCN   |
|-----------------|------------|------------|
|                 | Conv. (ee) | Conv. (ee) |
| 1 mM            | Full (99%) | Full (99%) |
| 2 mM            | Full (99%) | Full (99%) |
| 5 mM            | Full (99%) | 71% (99%)  |
| 10 mM           | 84% (96%)  | 50% (93%)  |

General conditions: 0.15 mM Cu(dmbipy), 0.67 mg/ml st-DNA, 15 eq cyclopentadiene.

<sup>1</sup>H-NMR spectra

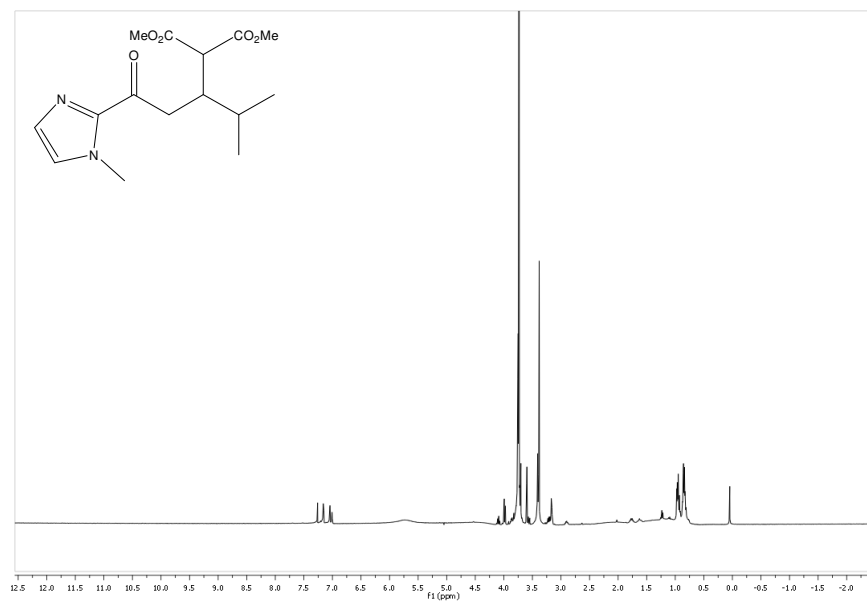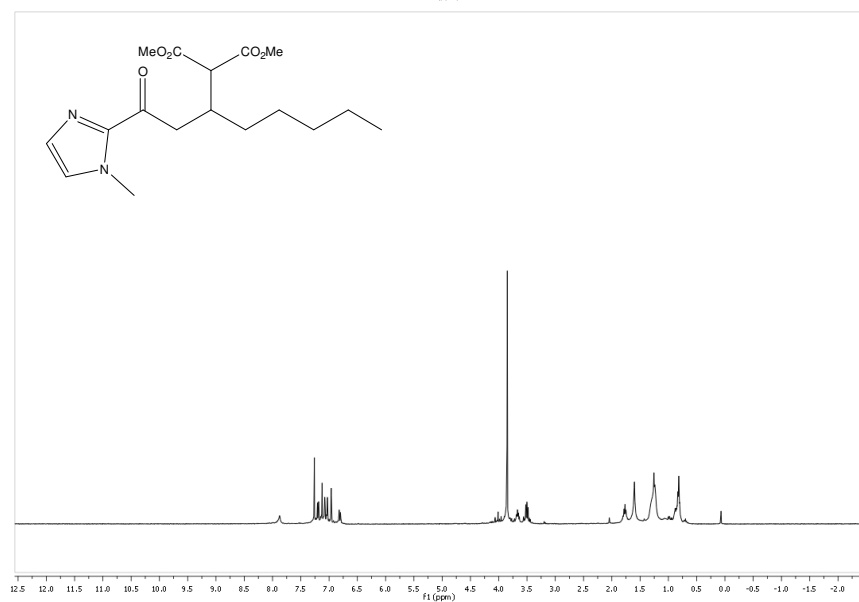



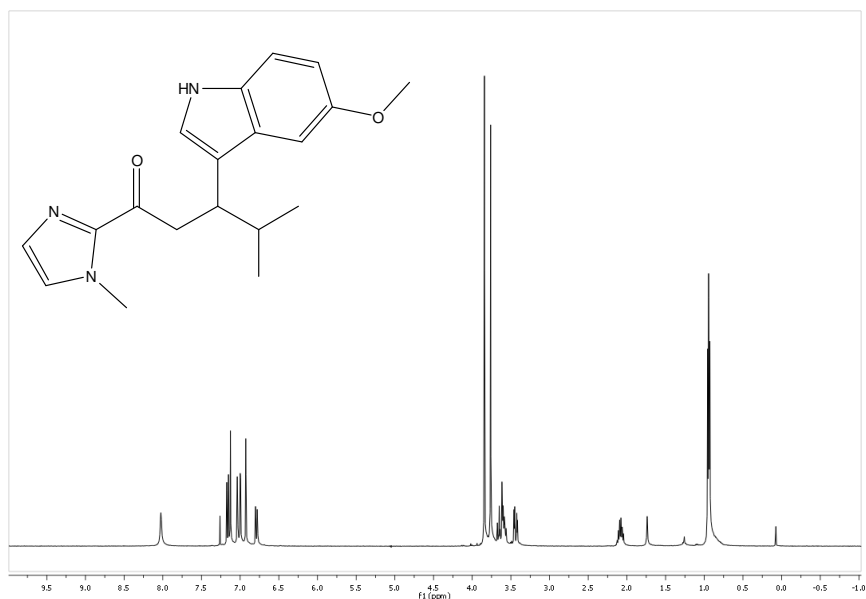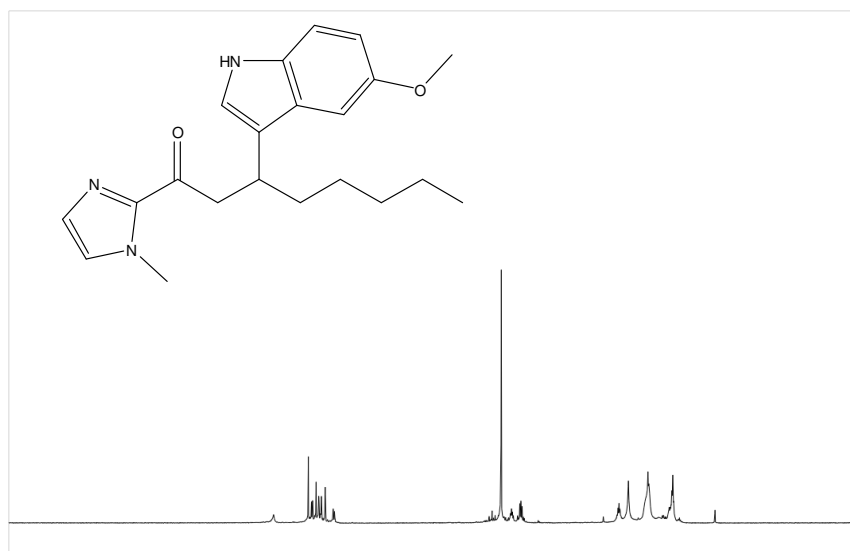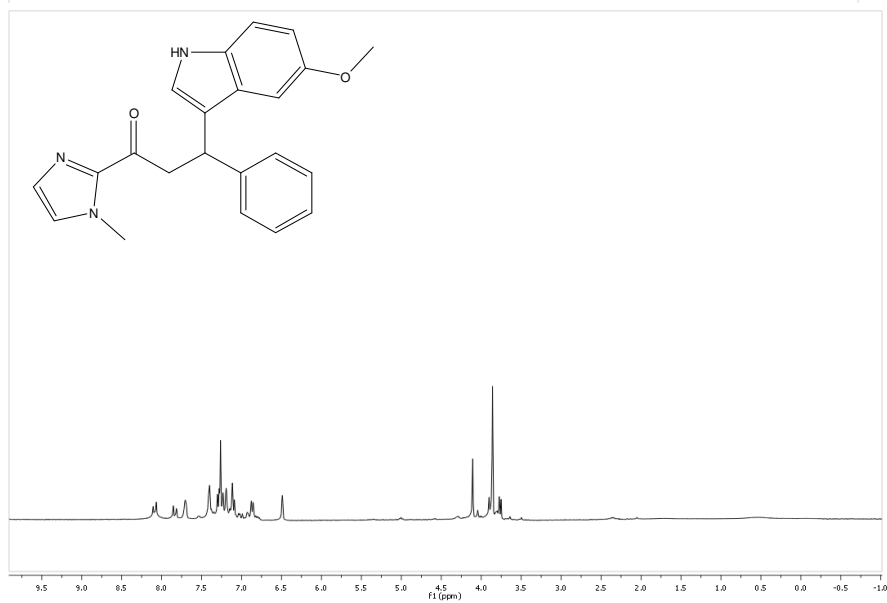

## References

1. S. Otto, F. Bertocin and J. B. F. N. Engberts, *J. Am. Chem. Soc.*, 1996, **118**, 7702-7707.
